# Supplementary material for: Farnesoid X receptor as marker of osteotropism of breast cancers through its role in the osteomimetism of tumor cells
Source: Springer Nature journal article supplement (doi:10.1186/s12885-020-07106-7), 2020-07-10
Supplement: MOESM2 [file 18170002]

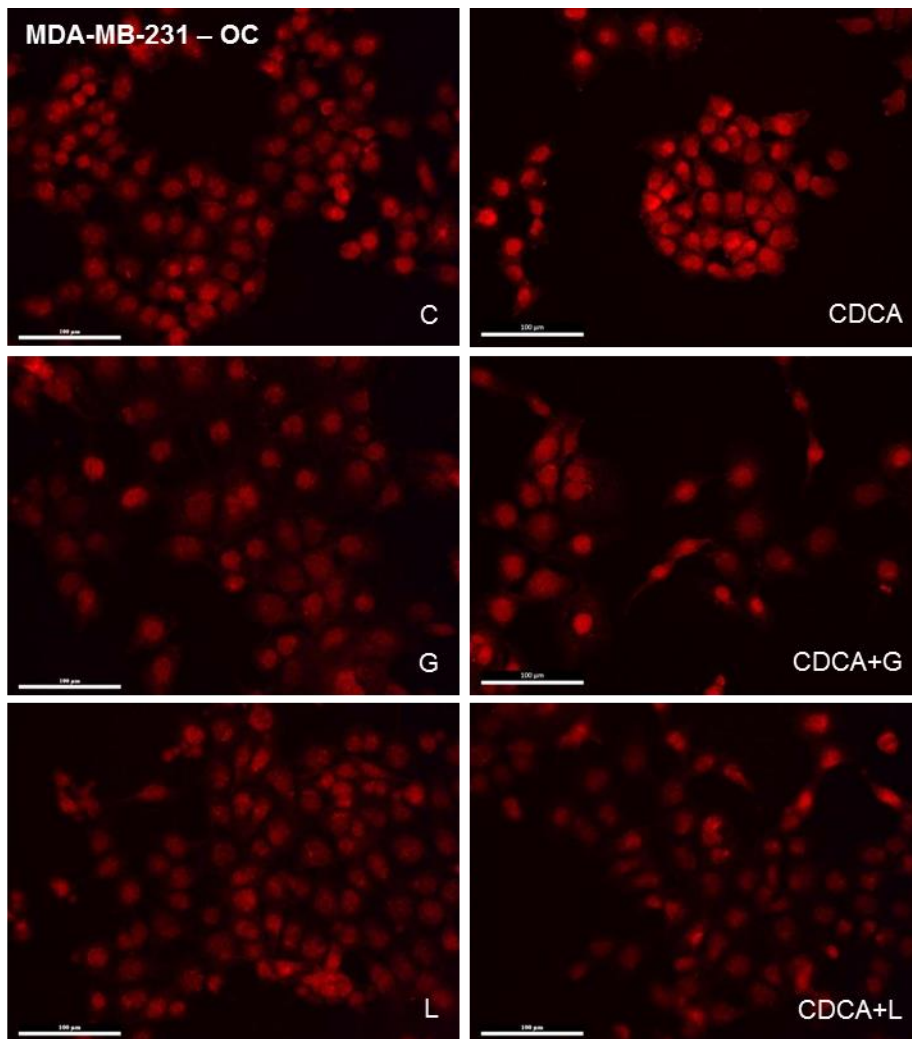

**Supplementary Figure 2:** OC expression after different treatments during 48h in MDA-M-231. OC was evidenced by immunofluorescence and is expressed in the cytoplasm. Z-guggulsterone (G) and LCA (L) caused no variation in OC expression compared to the control (C). CDCA treatment (CDCA) induced an increase of OC expression compared to the control (C). Z-guggulsterone or LCA in combined with CDCA (CDCA+G or CDCA+L) caused a decrease in OC expression compared to CDCA (CDCA). Scale bars = 100 µm.
