# Supplementary material for: Farnesoid X receptor as marker of osteotropism of breast cancers through its role in the osteomimetism of tumor cells
Source: Springer Nature journal article supplement (doi:10.1186/s12885-020-07106-7), 2020-07-10
Supplement: MOESM7 [file 18170002]

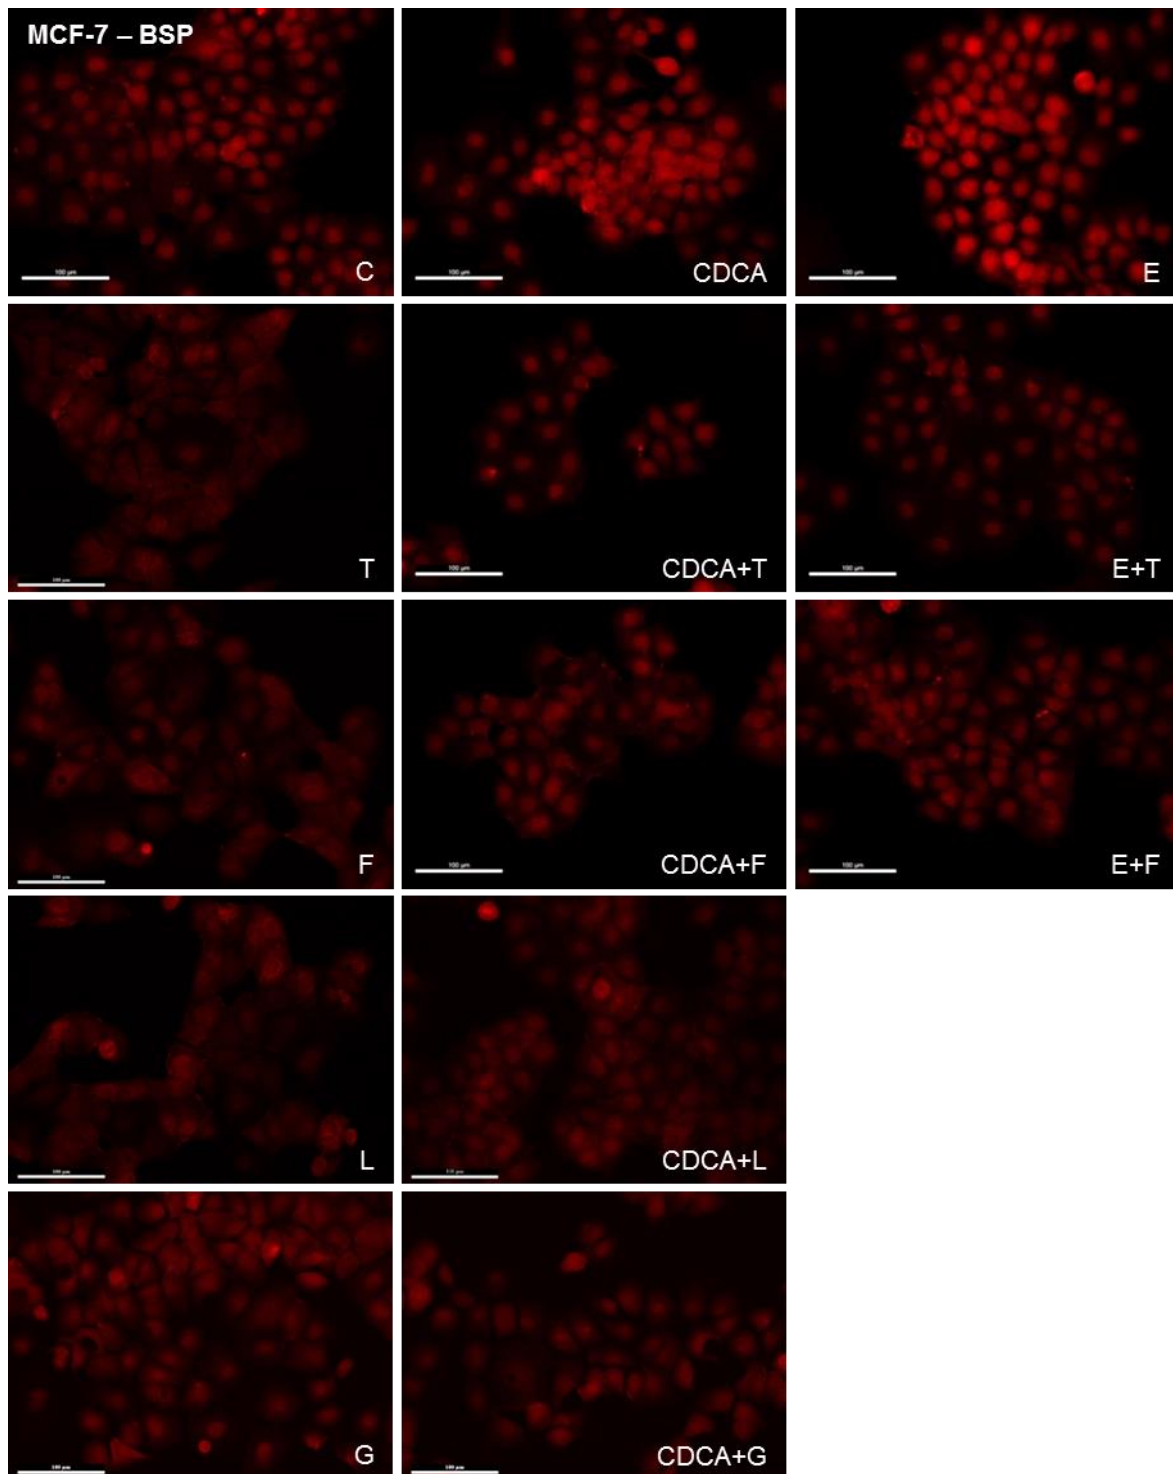

**Supplementary Figure 7:** BSP expression after different treatments during 48h in MCF-7. BSP was evidenced by immunofluorescence and is expressed in the cytoplasm. Estrogens (E) and CDCA (CDCA) induced an increase of BSP expression compared to the control (C). 4-hydroxytamoxifen (T), fulvestrant (F), LCA (L) and Z-guggulsterone (G) caused no variation in BSP expression compared to the control (C). 4-hydroxytamoxifen and fulvestrant in combined with estrogens or CDCA (E+T, E+F, CDCA+T, CDCA+F) caused a decrease of BSP expression compared to estrogens (E) or CDCA (CDCA). LCA and Z-guggulsterone in combined with CDCA (CDCA+L, CDCA+G) caused a decrease in BSP expression compared to CDCA (CDCA). Scale bars = 100 µm.
