# Supplementary material for: Farnesoid X receptor as marker of osteotropism of breast cancers through its role in the osteomimetism of tumor cells
Source: Springer Nature journal article supplement (doi:10.1186/s12885-020-07106-7), 2020-07-10
Supplement: MOESM10 [file 18170002]

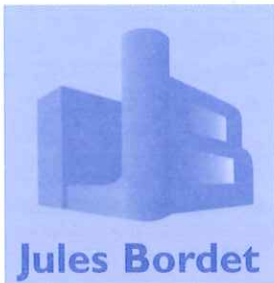

Institut Jules Bordet

Association Hospitalière de Bruxelles  
Centre des Tumeurs de l'ULB

Association régie par la loi du 8 juillet 1976  
Rue Héger-Bordet 1 - 1000 Bruxelles  
Tél.: (02) 541 31 11  
Dexia 091-0097278-16

## Comité d'Ethique

Tél : 02/541.35.95

*Email secrétariat :*

Comite.ethique@bordet.be

### Président

Dr. Th. Gil

### Vice-Président

Dr. D. Bron

### Secrétaire

Dr. D. Lossignol

### Membres

Dr. H. Bleiberg  
Dr. J. Klastersky  
Dr. M. Sosnowski  
Dr. Th. Renard  
M. P. Crombez  
(suppléante : Mme B.  
Fernéz)  
Mme M. Colin  
Mme M. Paesmans  
Mme N. De Loore  
Mme D. van Vyve  
Mme S. Greco  
Mme C. Deliens  
Mme M. Nevraumont

## LIST OF DOCUMENTS REVIEWED BY THE MEDICAL ETHICS COMMITTEE OF INSTITUT JULES BORDET - LEC

**Réf. : as**

**Date : 10/09/2015**

**Intern number : 2437**

**Investigator : DR. F. JOURNE**

### **Title**

**Rôle du FXR dans le cancer du sein**

### **Including**

Reply letter dd 31/08/2015  
ISF (corrected)  
Project description

## LEADING ETHICS COMMITTEE'S DECISION

**Approval**

**Approval with conditions**

**Need for extra information**

**Disapproval**

Signature of the Chairman of the Central Ethics Committee

  
Name : Dr. Th. GIL

Date : 10/09/2015

**List of members Ethics Committee (OM011)**  
*(from 01/06/2015)*

**Meeting dd 10/09/2015**

**CE2437**

|                   |                 |                      | Attendance |
|-------------------|-----------------|----------------------|------------|
| DR. TH. GIL       | Chairman        | Physician            | Yes        |
| DR. D. BRON       | Vice Chairman   | Physician            | No         |
| DR. D. LOSSIGNOL  | Secretary       | Physician            | Yes        |
| DR. H. BLEIBERG   | External member | Physician            | No         |
| DR. J. KLASTERSKY | Member          | Physician            | No         |
| DR. M. SOSNOWSKI  | Member          | Physician            | Yes        |
| DR. TH. RENARD    | External member | General Practitioner | Yes        |
| P. CROMBEZ        | Member          | Head Nurse           | Yes        |
| B. FERNEZ         | Member          | Head Nurse           | No         |
| M. COLIN          | External member | Nurse / Logopedist   | Yes        |
| M. PAESMANS       | Member          | Statistician         | No         |
| D. VAN VYVE       | Member          | Lawyer               | Yes        |
| S. GRECO          | Member          | Lawyer               | No         |
| N. DE LOORE       | External member | Lay person           | Yes        |
| C. DELIENS        | Member          | Pharmacist           | No         |
| M. NEVRAUMONT     | Member          | Pharmacist           | No         |

The Ethics Committee operates according to ICH Good Clinical Practice and local applicable regulations
